# Supplementary material
Source: Royal Society of Chemistry journal article supplement (doi:10.1039/d5cc07126g)
Supplement: d5cc07126g1.pdf [file d5cc07126g1.pdf]

## Supporting information

### **Metal Free Azophenine based Electrocatalyst: A Promising Approach Towards Sustainable Alkaline Hydrogen Evolution**

**Sandip Kumar Tudu,<sup>a,b</sup> Debojyoti Kundu,<sup>a,b</sup> Sanjukta Zamindar,<sup>a,b</sup> Riyanka Das,<sup>c</sup>  
Sunanda Maji,<sup>a,b</sup> Priyabrata Banerjee<sup>\*a,b</sup>**

<sup>a</sup> *Electric Mobility and Tribology Research Group, CSIR – Central Mechanical Engineering Research Institute (CMERI), Mahatma Gandhi Avenue, Durgapur, 713209, West Bengal, India*

<sup>b</sup> *Academy of Scientific and Innovative Research (AcSIR), Ghaziabad, 201002, India*

<sup>c</sup> *International Institute for Sustainability with Knotted Chiral Meta Matter (WPI-SKCM<sup>2</sup>), 2-313 Kagamiyama, Higashi-Hiroshima City, Hiroshima, Japan 739-0046.*

*\*Corresponding author:*

*Priyabrata Banerjee, E-mail address: pbanerjee.cmeri@csir.res.in*

| <b>Sl. No</b> | <b>Contents</b>                                                                                                 | <b>Page no</b> |
|---------------|-----------------------------------------------------------------------------------------------------------------|----------------|
| 1.            | General information                                                                                             | 3-5            |
| 2.            | <b>Fig. S1.</b> FT-IR spectra of <b>CN-1</b> .                                                                  | 6              |
| 3.            | <b>Fig. S2.</b> <sup>1</sup> H NMR spectrum of <b>CN-1</b> in DMSO-d <sub>6</sub> (400Hz)                       | 7              |
| 4.            | <b>Fig. S3.</b> FT-IR spectra for the Hydrolytic stability of <b>CN-1</b> .                                     | 8              |
| 5.            | <b>Fig. S4.</b> PXRD patterns for the Hydrolytic stability of <b>CN-1</b> .                                     | 9              |
| 6.            | <b>Fig. S5.</b> FT-IR spectra for the pH stability of <b>CN-1</b> .                                             | 10             |
| 7.            | <b>Fig. S6.</b> PXRD pattern for the pH stability of <b>CN-1</b> .                                              | 11             |
| 8.            | <b>Fig. S7.</b> XPS Survey Spectrum of <b>CN-1</b> .                                                            | 12             |
| 9.            | <b>Fig. S8.</b> Polarisation Curve before and after catalysis.                                                  | 13             |
| 10.           | <b>Fig. S9.</b> Non-Faradaic CV and C <sub>dl</sub> plot of <b>CN-1</b> .                                       | 14             |
| 11.           | <b>Fig. S10.</b> Polarisation curve of <b>CN-1</b> at different hydrolytic conditions.                          | 15             |
| 12.           | <b>Fig. S11.</b> Tafel slopes of <b>CN-1</b> at different hydrolytic conditions.                                | 16             |
| 13.           | <b>Fig. S12.</b> Nyquist plots of <b>CN-1</b> at different hydrolytic conditions.                               | 17             |
| 14.           | <b>Fig. S13.</b> FE-SEM image after catalysis of <b>CN-1</b> .                                                  | 18             |
| 15.           | <b>Fig. S14.</b> HRTEM image after catalysis of <b>CN-1</b> .                                                   | 19             |
| 16.           | <b>Fig. S15.</b> XPS analysis of before and after catalysis of <b>CN-1</b> .                                    | 20             |
| 17.           | <b>Fig. S16.</b> PXRD analysis of before and after catalysis of <b>CN-1</b> .                                   | 21             |
| 18.           | <b>Fig. S17.</b> Geometrically optimized structure for <b>CN-1</b> .                                            | 22             |
| 19.           | <b>Table S1:</b> Analysis label and concentration average of iron regarding ICP-MS analysis.                    | 23             |
| 20.           | <b>Table S2:</b> Performance comparison of <b>CN-1</b> at different hydrolytic conditions for the HER activity. | 24             |
| 21.           | <b>Table S3:</b> Fukui (-) values for <b>CN-1</b> .                                                             | 25             |
| 22.           | <b>Table S4:</b> Performance comparison of Metal free electrocatalysts for the HER activity.                    | 26             |

## General information

### Materials

All chemicals were purchased commercially and used without further purification Ferric Chloride hexahydrate ( $\text{FeCl}_3 \cdot 6\text{H}_2\text{O}$ ), ortho Anisidine, potassium hydroxide (KOH), Platinum on Carbon (10 wt. %), 2-Propanol, methanol, absolute ethanol and acetone were purchased from Sigma-Aldrich, dichloromethane (DCM), hexane were purchased from Merck India Pvt. Ltd. Deionized water was used throughout all experiments.

### Instrumentation

**FT-IR analysis:** FT-IR spectroscopic data were recorded in solid state using KBr pellets on PerkinElmer Spectrum 100 FT-IR spectrometer in the region of  $4000\text{-}400\text{ cm}^{-1}$ .

**$^1\text{H}$  NMR Analysis:** The  $^1\text{H}$  NMR spectra recorded by ASCEND 400 modelled 400 MHz NMR spectrophotometer (Bruker, USA). The NMR spectra of all the materials were obtained by using DMSO- $d_6$  solvent.

**Powder X-ray diffraction (PXRD) data analysis:** Crystallinity and phase purity were analysed by PXRD data. By using a mortar and pestle, 20 mg of the sample was ground into a fine powder. Cu  $K\alpha$  X-ray radiation ( $\lambda = 1.5418\text{ \AA}$ ) was used in a BRUKER D8 Discover diffractometer to obtain the sample's PXRD data at room temperature. Data was collected at a scan rate of  $1^\circ/\text{min}$  using a working voltage and current of 40 kV and 20 mA, respectively.

**FE-SEM analysis:** Surface morphology of synthesised material was analysed by FESEM, Zeiss Sigma microscope, Oxford Instruments, Germany.

**HR-TEM analysis:** A JEM 2100 (JEOL, Japan) high-resolution transmission electron microscope was used for the microscopic analysis.

**X-ray photoelectron spectroscopy:** The surface chemical composition of the as synthesised material was further analysed by XPS using PHI 5000 Versa Prode III system with a monochromatic Al  $K\alpha$  (1486.6 eV) X-ray radiation operated at working voltage 15 kV and 20 mA current. A pallet of the compound was used for the measurement after sputtering of 30 sec. The binding energies are calibrated vs. carbon ( $\text{C}1s = 284.6\text{ eV}$ ). XPS spectra were deconvoluted by using Origin software.

**Inductively Coupled Plasma Mass Spectrometry (ICP-MS):** The trace levels of iron species were quantified using inductively coupled plasma mass spectrometry (ICP-MS) on a Thermo Fisher Scientific ICAPRQ instrument. **ME:** Multi Element standards directly purchased from sigma that includes Al, Sb, Ba, Pb, B, Ca, Cd, Cr, Co, Fe, K, Cu, Li, Mg, Mn, Mo, Na, Ni, P, Si, Ti, V, and Zn in 5% nitric acid and  $\leq 0.1\%$  hydrofluoric acid. **Mix:** Mix Elements prepared using individual standards of Hg + Au + As in 5% nitric acid and  $\leq 0.1\%$  hydrofluoric acid. **ME + Mix** represents the standard, included all the 25 elements of both sets.

## Synthesis procedure

At first the mixture of (950 mg) o-Anisidine and (160 mg) FeCl<sub>3</sub>.6H<sub>2</sub>O was taken in a culture vial then it was allowed to stand at 90°C for 3hr in presence of air, after that the mixture was extracted in a beaker with Dichloromethane (DCM) and allowed to stand at room temperature for solvent reduction. For separation, Colum chromatography was performed with the help of 1:1 hexane-DCM mixture. A bright red coloured crystalline product was collected.

## Electrochemical measurements

All electrochemical assessments were conducted at room temperature by using CHI660B electrochemical workstation. Three-electrode configuration was employed using Pt wire as a counter electrode, Ag/AgCl as a reference electrode and the sample was taken as a working electrode, the working electrode was prepared by using spin-coating on properly edged Ni foam of 1x0.5 cm<sup>2</sup> area. 1M KOH was taken as an electrolyte for further electrochemical studies. Pt/C (10 wt.%) was also taken in the same manner for further comparison. Therefore, the electrochemical studies were assessed by using linear sweep voltammetry (LSV), by scanning the potential range from 0 to -2 V for HER at a scan rate of 10 mV cm<sup>-1</sup> with respected to the Ag/AgCl as a reference electrode. All potential calculations were converted to Reversible Hydrogen Electrode (RHE) scale using Eq. 1.

$$E_{RHE} = E_{appl} + E_{Ag/AgCl} + 0.059 \times pH \dots\dots\dots \text{Eq. 1.}$$

Where, E<sub>appl</sub> is the applied potential of the RHE, the potential of the Ag/AgCl (saturated KCl) reference electrode (E<sub>Ag/AgCl</sub> = 0.198 V vs RHE, T = 25 °C), and the pH of the electrolyte solution (1M KOH pH~13.9). The impedance was assessed in 1M KOH solution in the range of 10 kHz to 1 Hz for the catalytic behaviour of the material electrode and the electrolyte solution. Double layer capacitance is another parameter for forecasting its catalytic activity by calculating its ECSA. Electrochemical Surface area (ECSA) was calculated by using the Eq. 2.

$$ECSA = C_{dl}/C_s \dots\dots\dots \text{Eq. 2.}$$

The working electrode was prepared as follows: 4mg of sample was taken in a 400µl of solution, contained 200 µl of 2-propanol and 200 µl of deionised water. In addition, 1mg of PVDF was added into the solution as binder. After that it was allowed to stand at ultrasonication for maintaining the homogeneity. In order to develop the working electrode, 200 µl of prepared solution was drop-casted on a Nickel foam then left to evaporate the solvent.

## Computational methods

Density functional Theory (DFT) of the CN-1 was performed by using Dmol3 module in material studio to evaluate the frontier molecular orbitals (FMO). The generalized gradient approximation (GGA) with Perdew–Burke–Ernzerhof (PBE) exchange-corelation function was employed. Based on PXRD data of CN-1, 1x1 supercell was constructed with the facet (010). The surface model (010) was contained of 60 atoms. Moreover, moderate level of calculations was applied using self-consisted field (SCF) convergence creation of 10<sup>-5</sup> and 100 SCF repetition cycles in combination with DNP basis set. COSMO was chosen as an aqueous solvent during the simulation with the dielectric constant 78.54.

In order to evaluate the theoretical prediction of the activity regarding HER on the solid electrode surface free energy calculation plays a vital role. Gibbs free energy of the hydrogen adsorption is derived from the equation mentioned below (Eq. 3).<sup>1</sup>

$$\Delta G_{H^*} = \Delta E_{H^*} + \Delta E_{ZPE} - T\Delta S_H \dots\dots\dots \text{Eq. 3.}$$

Where ( $\Delta G_{H^*}$ ) is Gibbs free energy of the adsorbed hydrogen, ( $\Delta E_{ZPE}$ ) is the zero-point energy, ( $\Delta S_H$ ) is the entropy of adsorption at temperature T.

$\Delta E_{H^*}$  was calculated by taking the separated H<sub>2</sub> as a reference state (Eq. 4)

$$\Delta E_{H^*} = E_{(\text{Surface} + H^*)} - E_{(\text{Surface})} - \frac{1}{2}E_{H_2} \dots\dots\dots \text{Eq. 4.}$$

$\Delta E_{ZPE}$  for isolated H<sub>2</sub> or adsorbed H\* can be obtained by the (Eq. 5).

$$\Delta E_{ZPE} = \frac{1}{2} \sum h\nu_i \dots\dots\dots \text{Eq. 5.}$$

Where  $\nu_i$  is the computed vibrational frequencies.

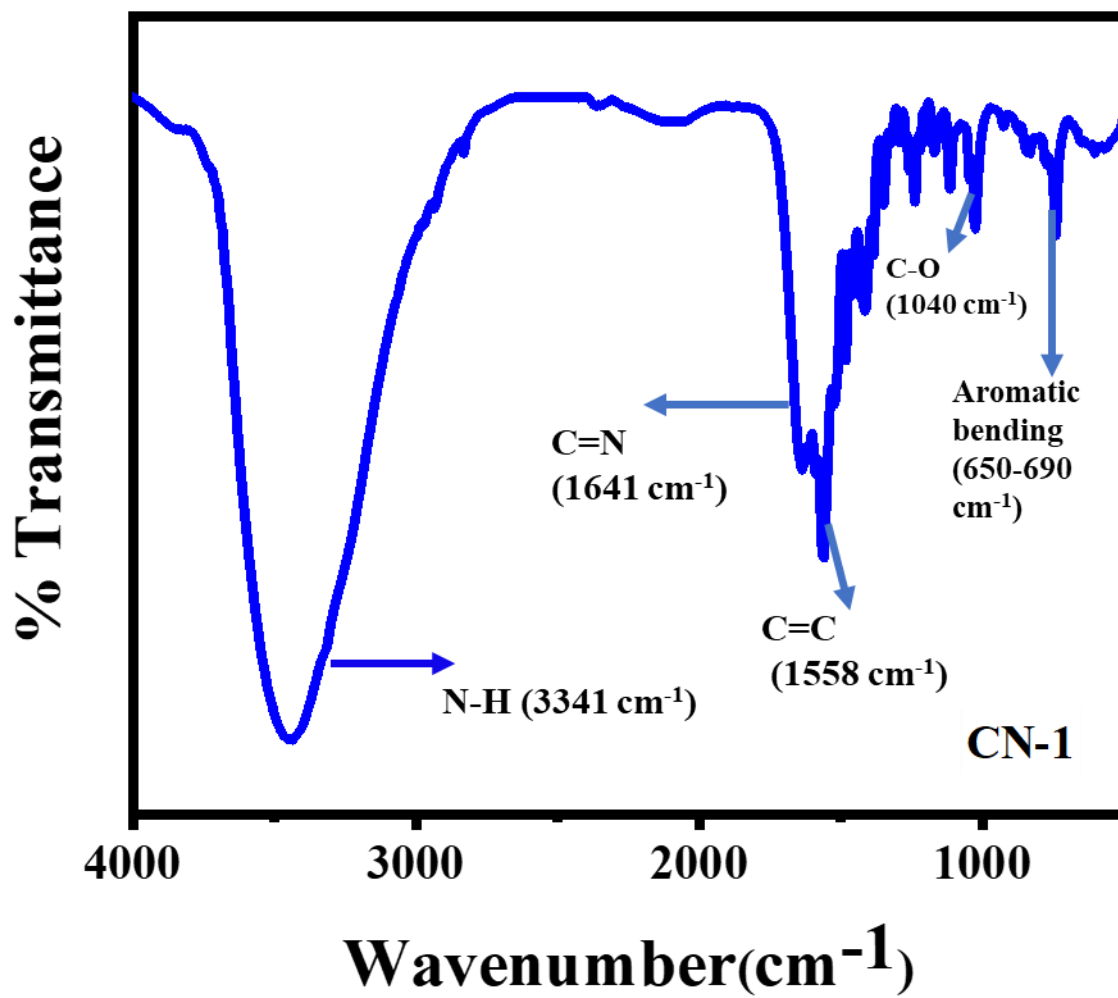

Fig. S1: FT-IR spectra of CN-1.

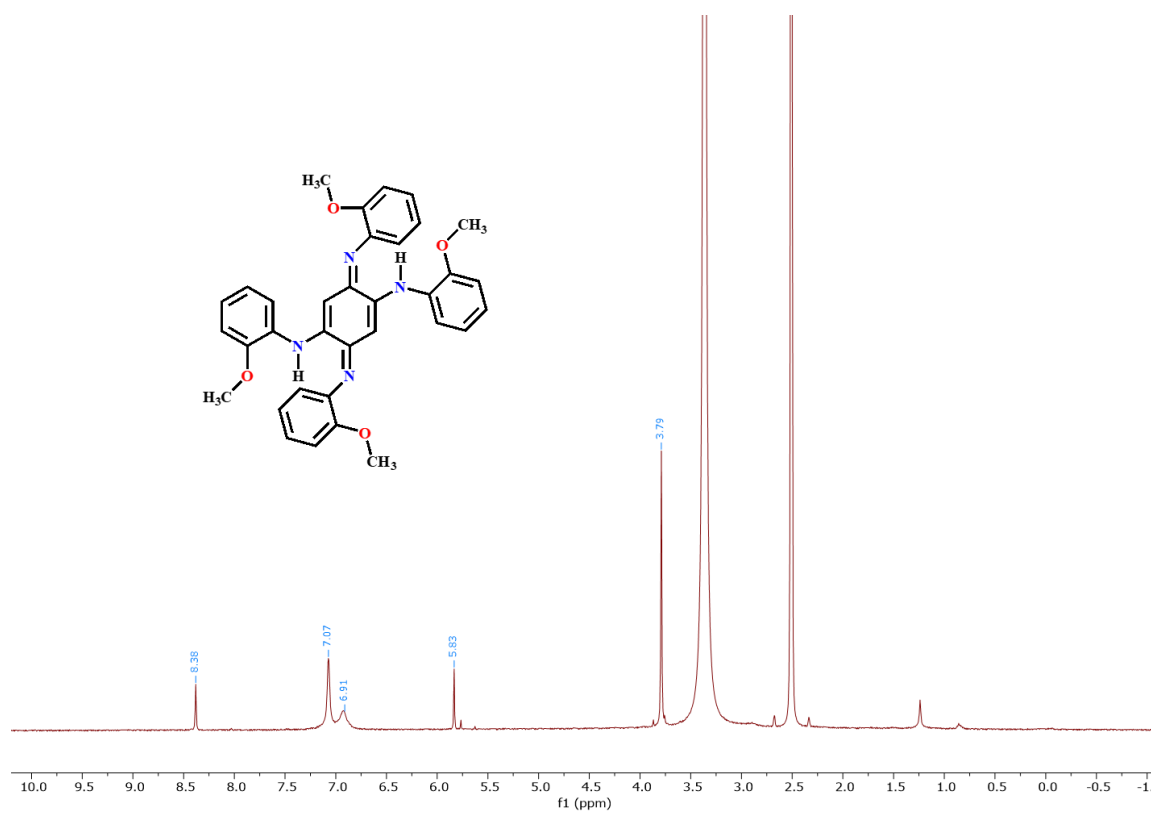

**Fig. S2.** <sup>1</sup>H NMR spectrum of **CN-1** in DMSO-d<sub>6</sub> (400Hz)

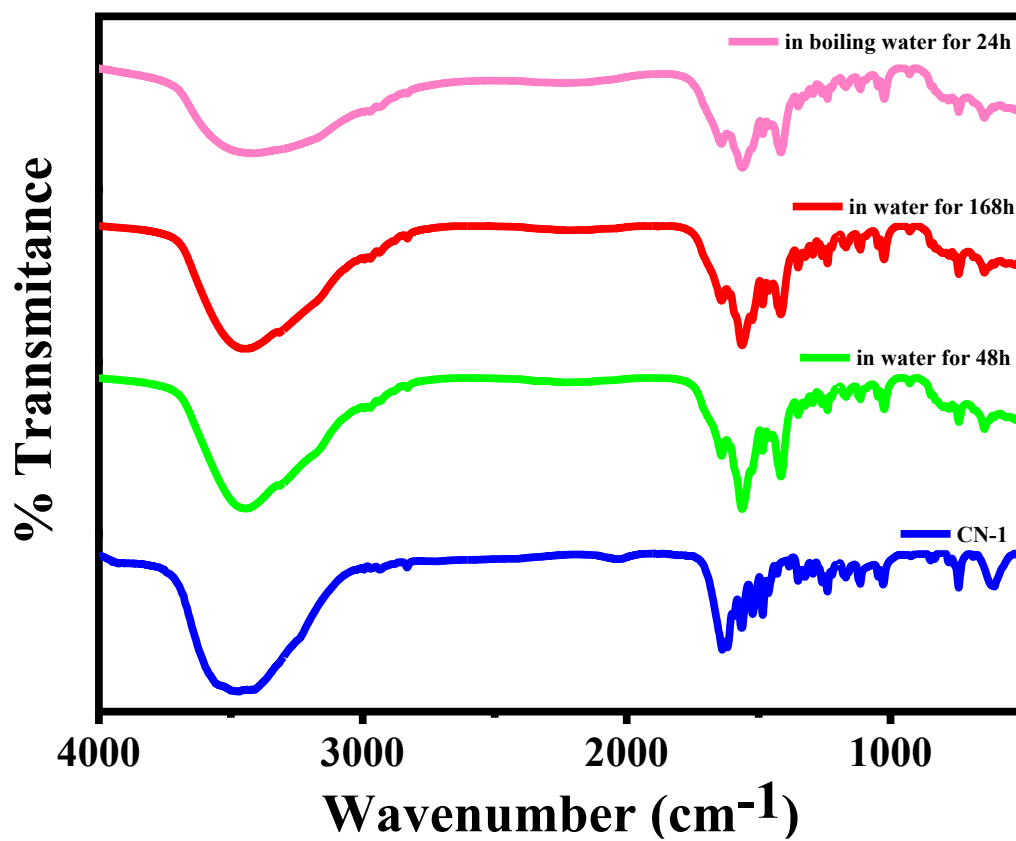

Fig. S3: FT-IR spectra for the Hydrolytic stability of CN-1.

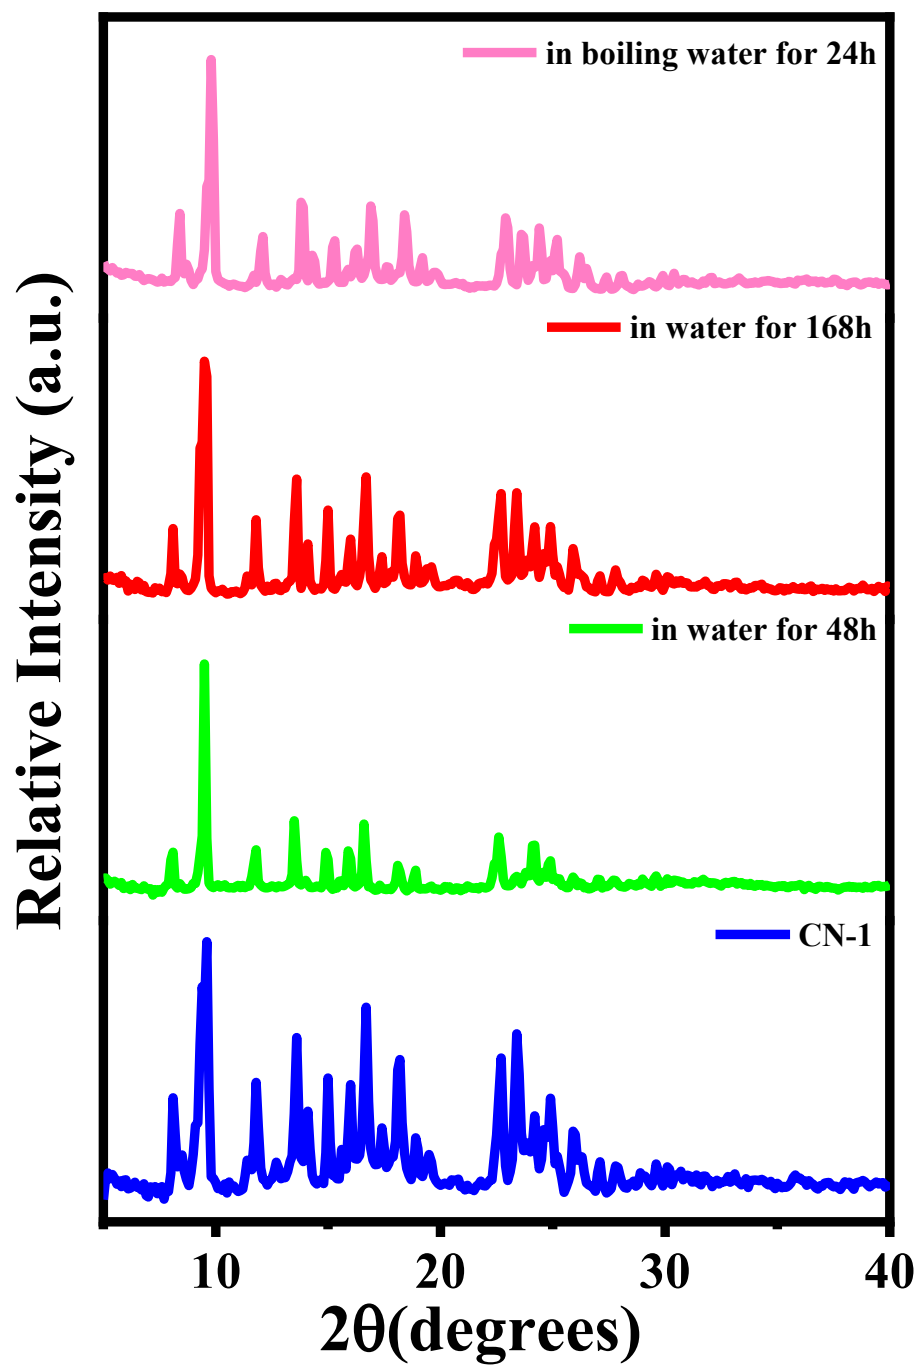

Fig. S4. PXRD patterns for the Hydrolytic stability of CN-1.

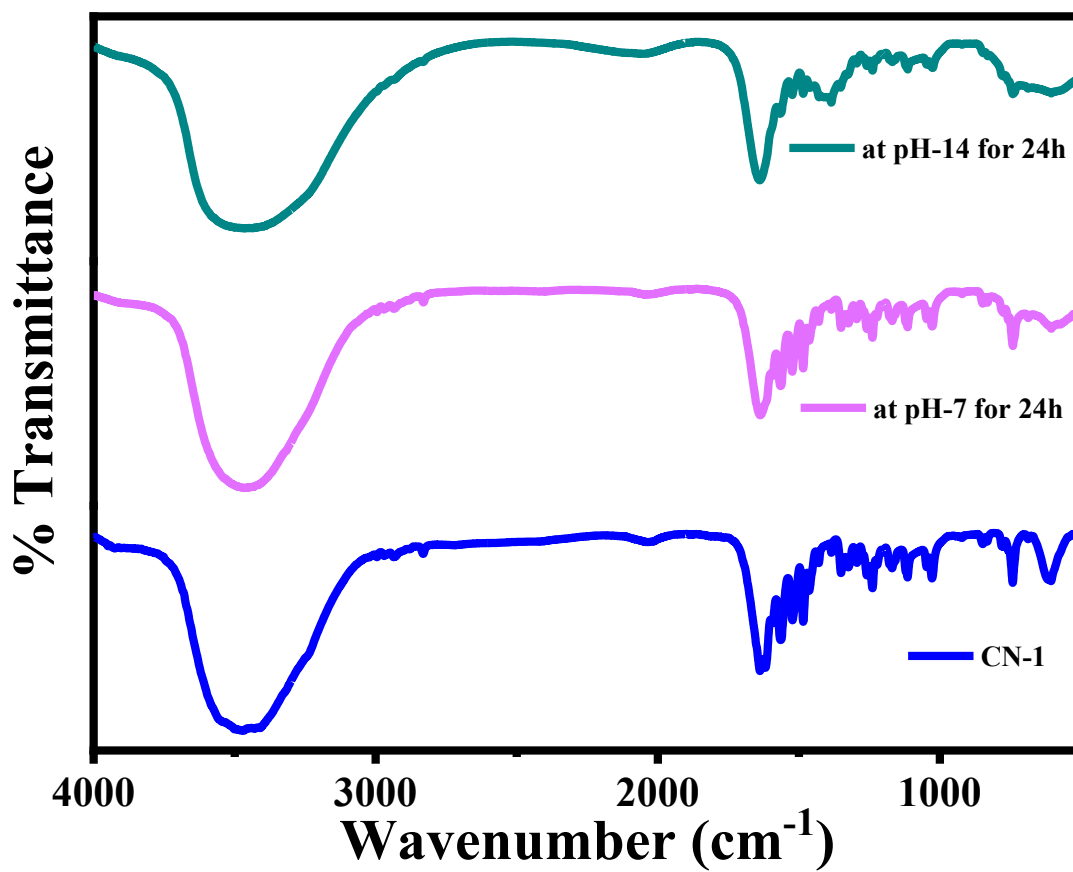

**Fig. S5.** FT-IR spectra for the pH stability of CN-1.

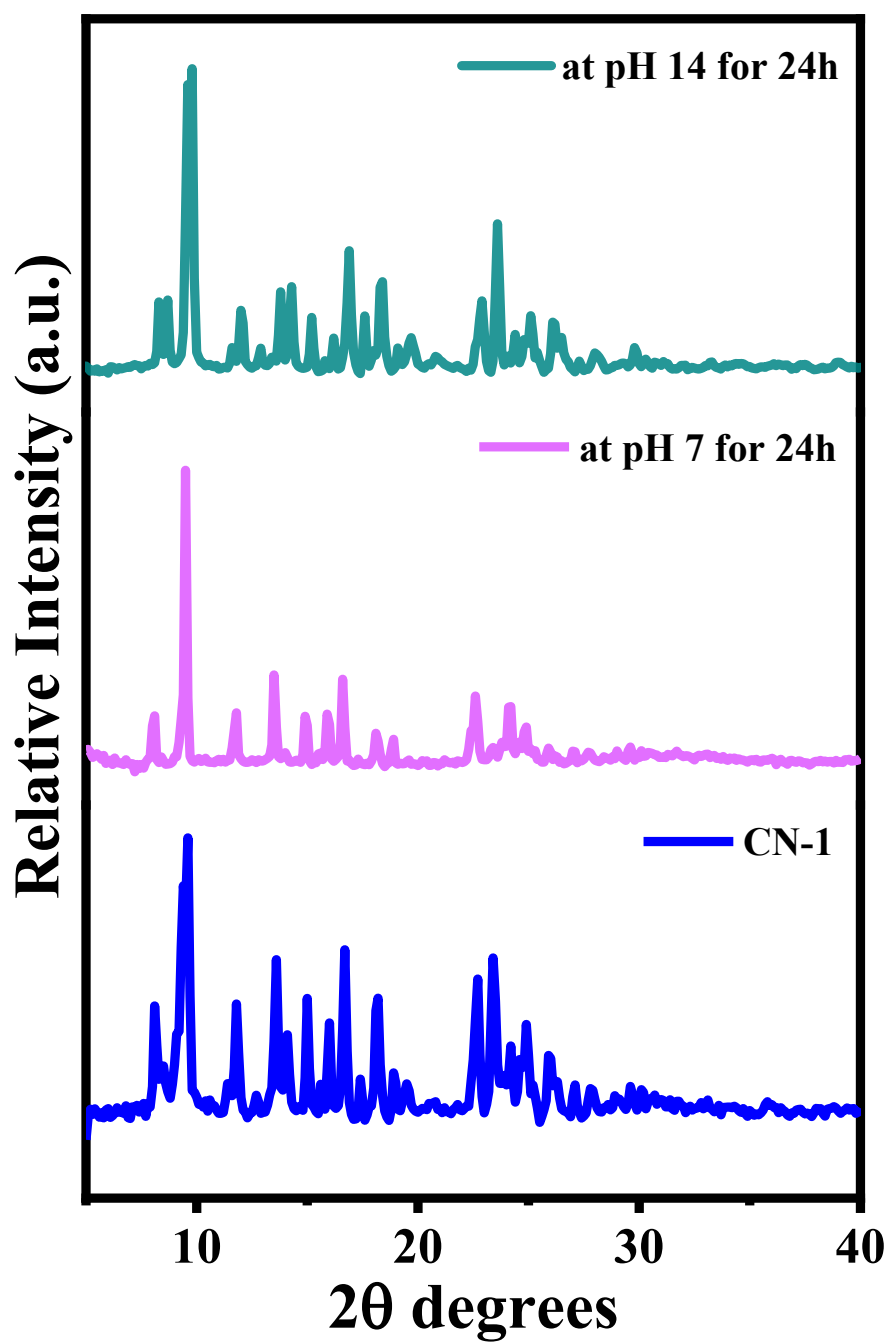

**Fig. S6.** PXRd pattern for the pH stability of CN-1.

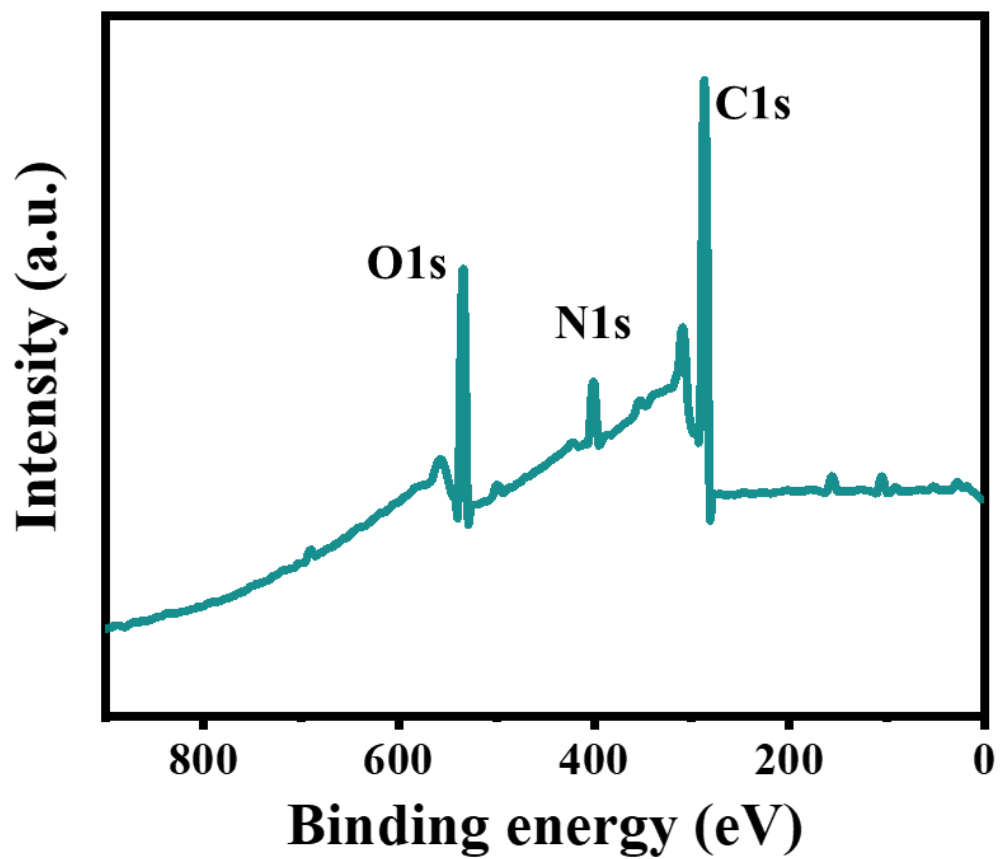

**Fig. S7:** XPS Survey Spectrum of **CN-1**.

## Electrochemical Studies

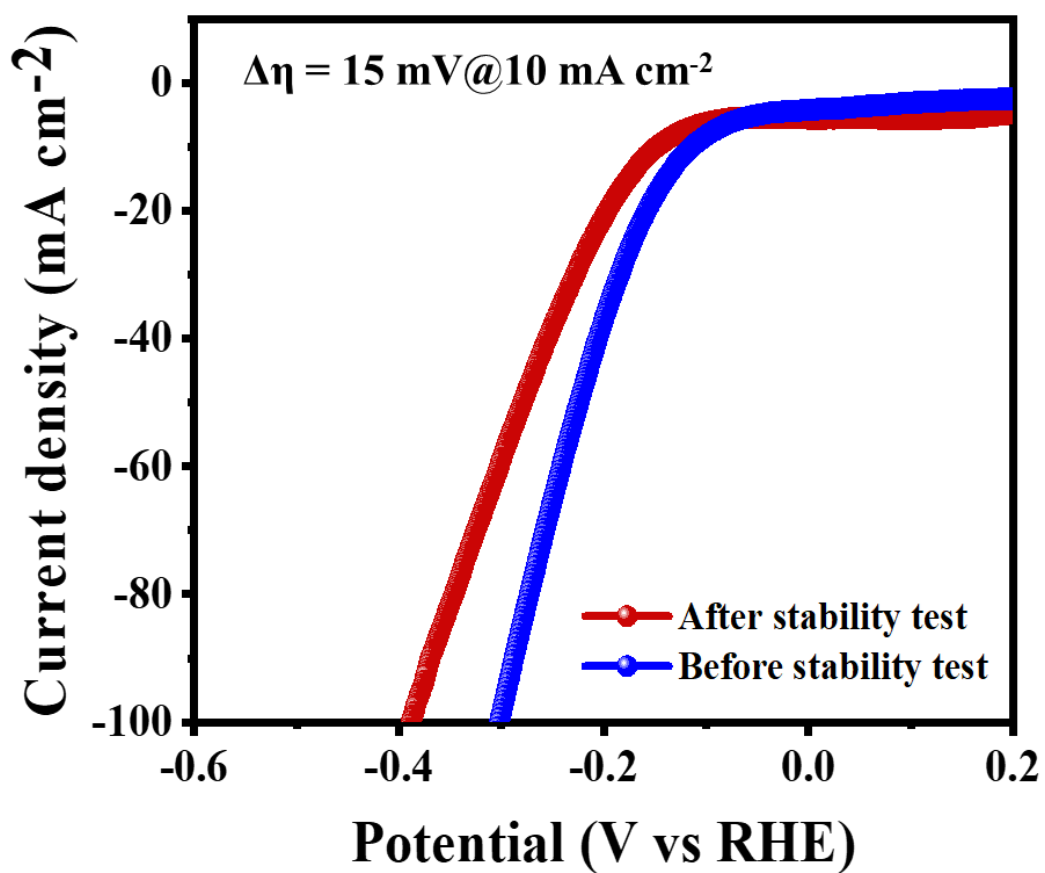

**Fig. S8:** LSV curve before and after catalysis of CN-1

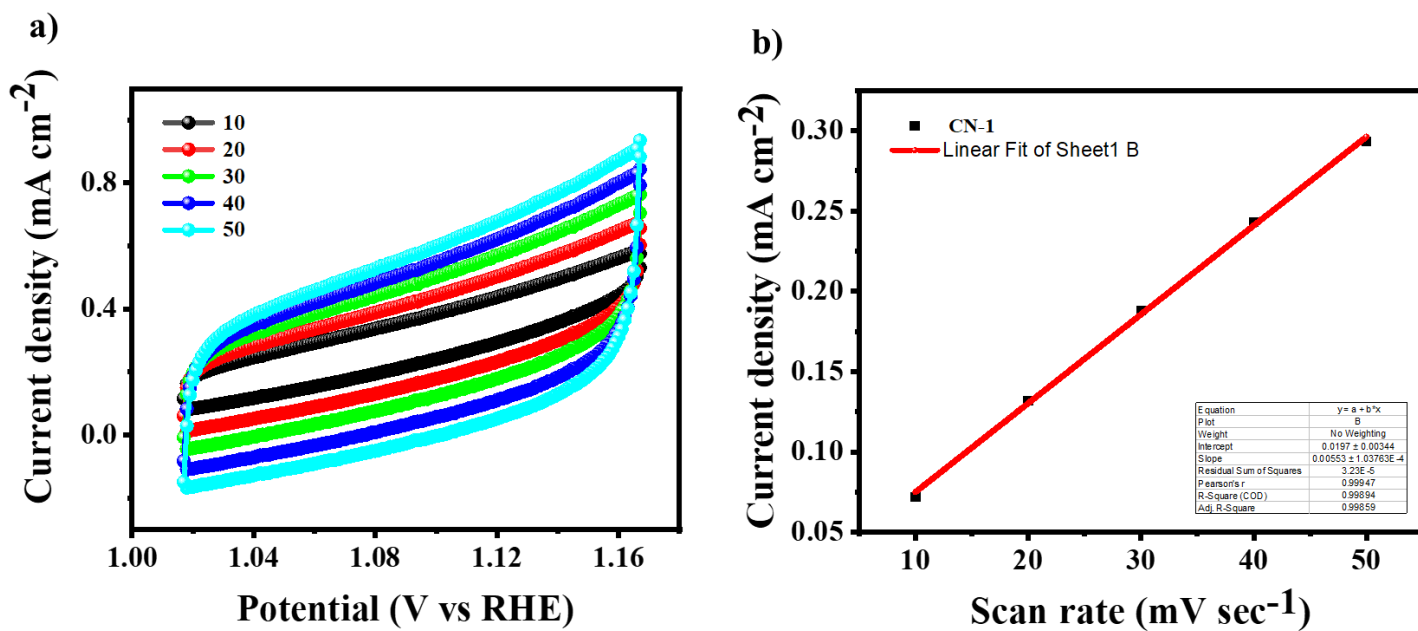

**Fig. S9:** Non-Faradaic CV and  $C_{dl}$  plot of **CN-1** at 1M KOH.

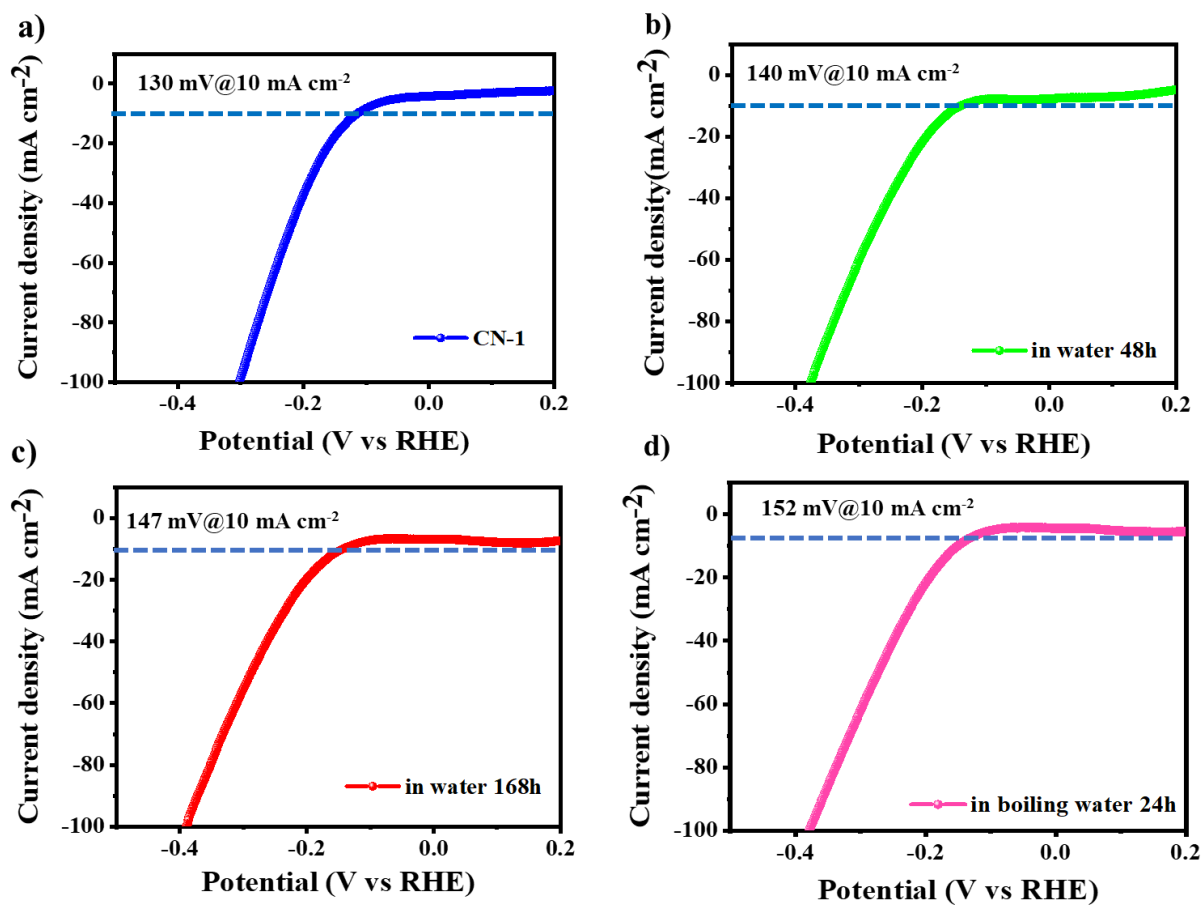

**Fig. S10:** Polarisation curve of CN-1 at different hydrolytic conditions, a) 12 h, b) 48 h, c) 168 h, d) in boiling water 24 h.

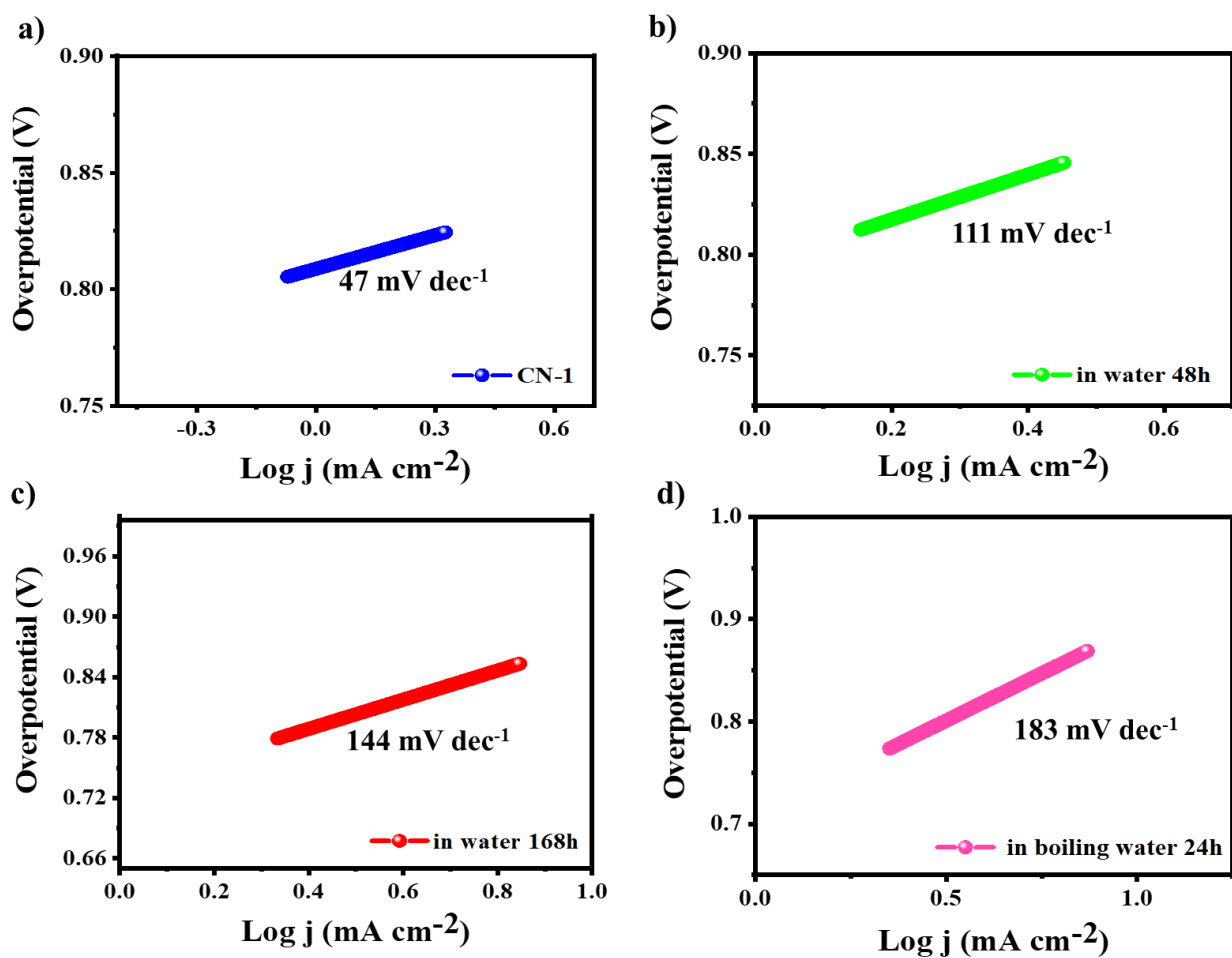

**Fig. S11:** Tafel slopes of CN-1 at different hydrolytic conditions, a) 12 h, b) 48 h, c) 168 h, d) in boiling water 24 h.

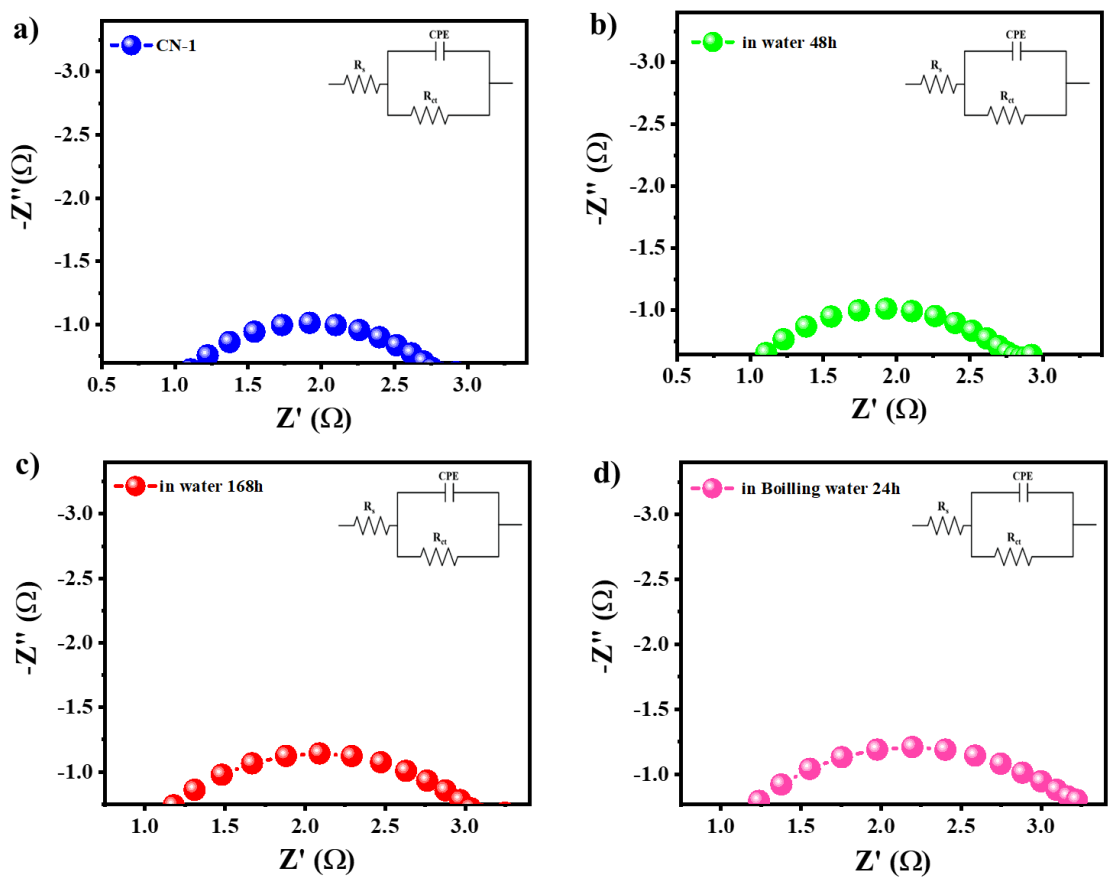

**Fig. S12:** Nyquist plots of CN-1 at different hydrolytic conditions, a) 12 h, b) 48 h, c) 168 h, d) in boiling water 24 h.

## Post catalysis

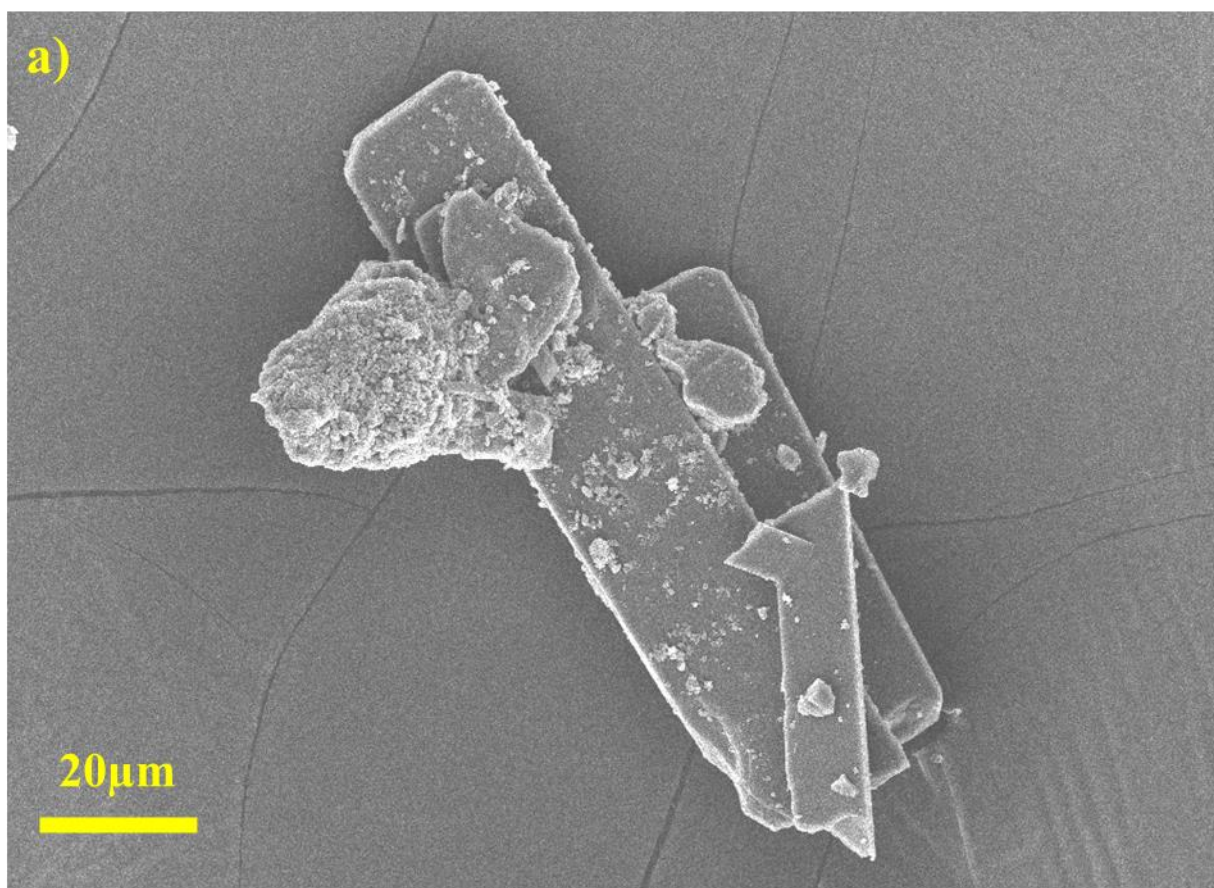

**Fig. S13:** SEM image after catalysis of CN-1.

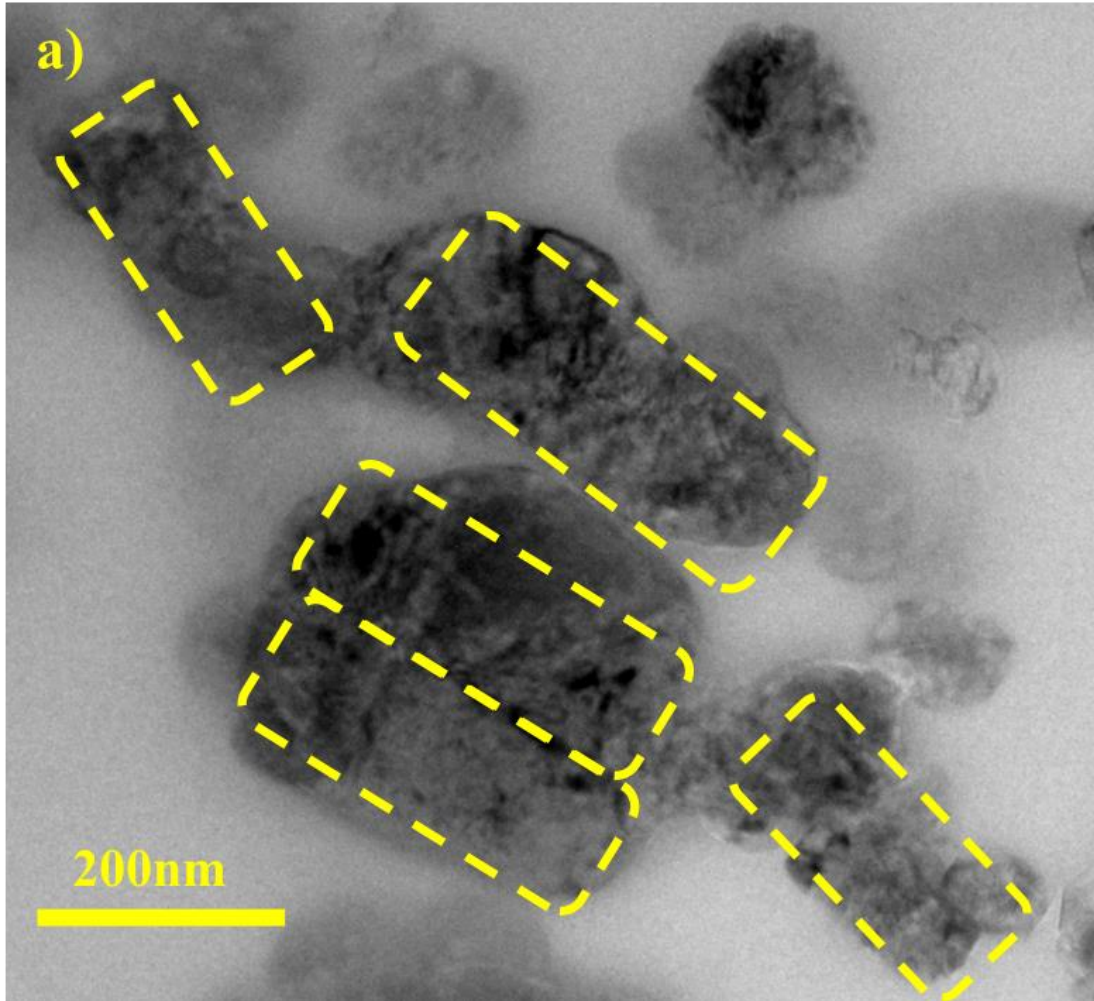

**Fig. S14:** TEM image after catalysis of CN-1.

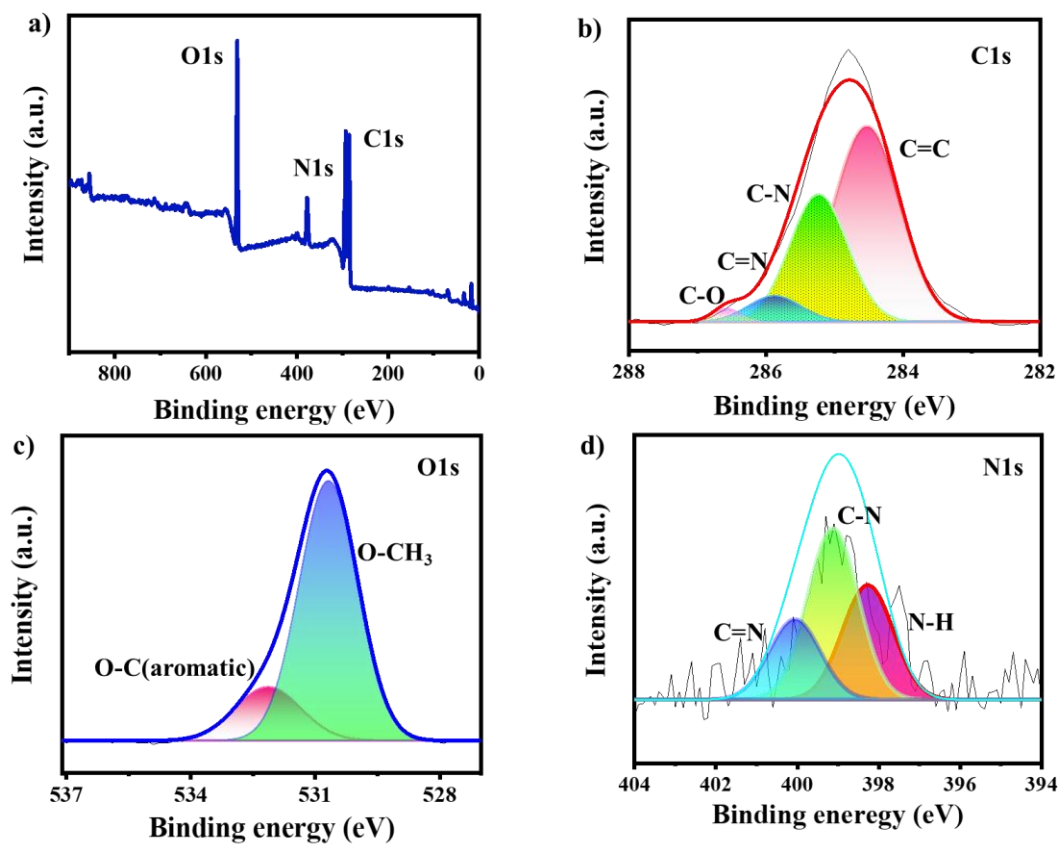

**Fig. S15:** XPS analysis after catalysis of **CN-1**

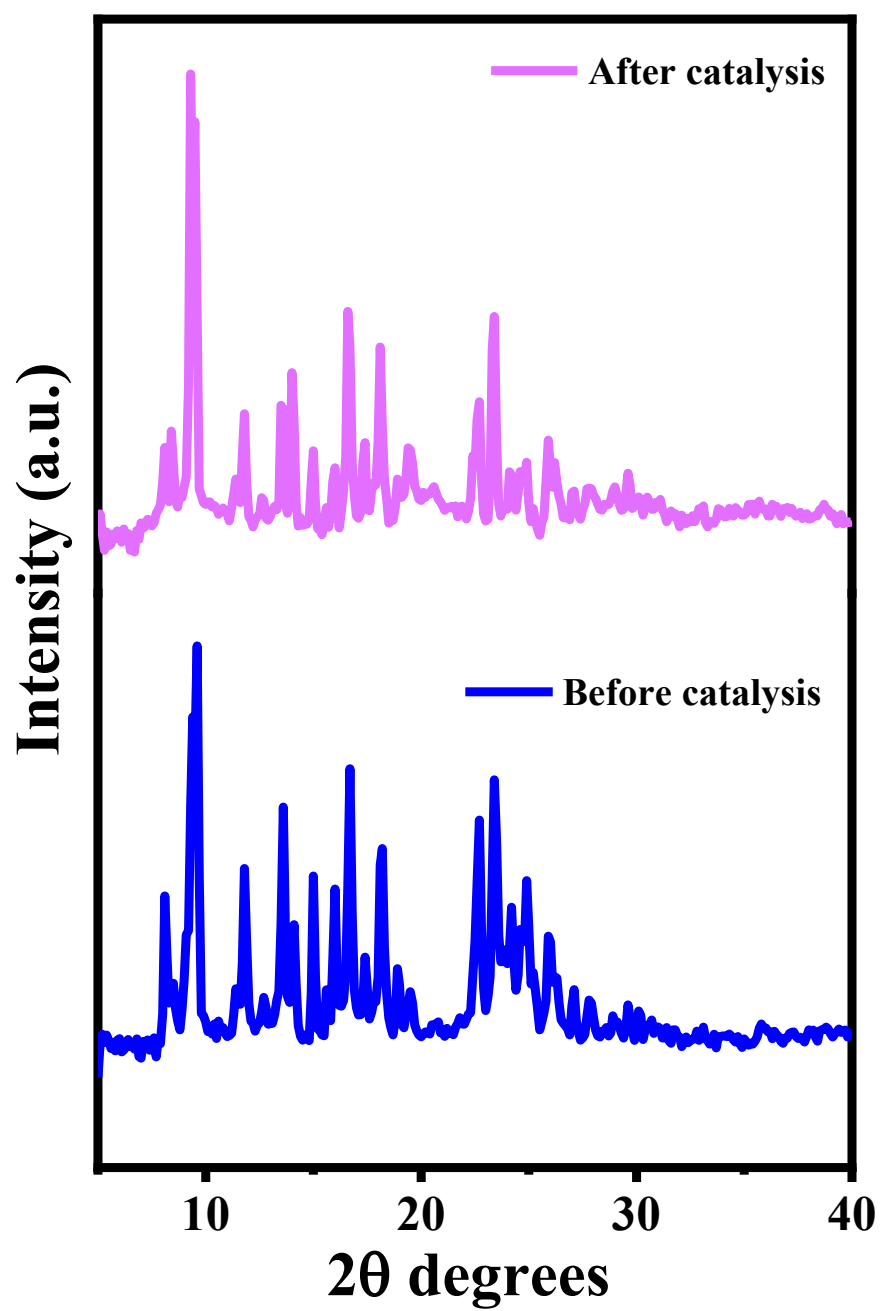

**Fig. S16:** PXRD analysis before and after catalysis of CN-1

# Theoretical analysis

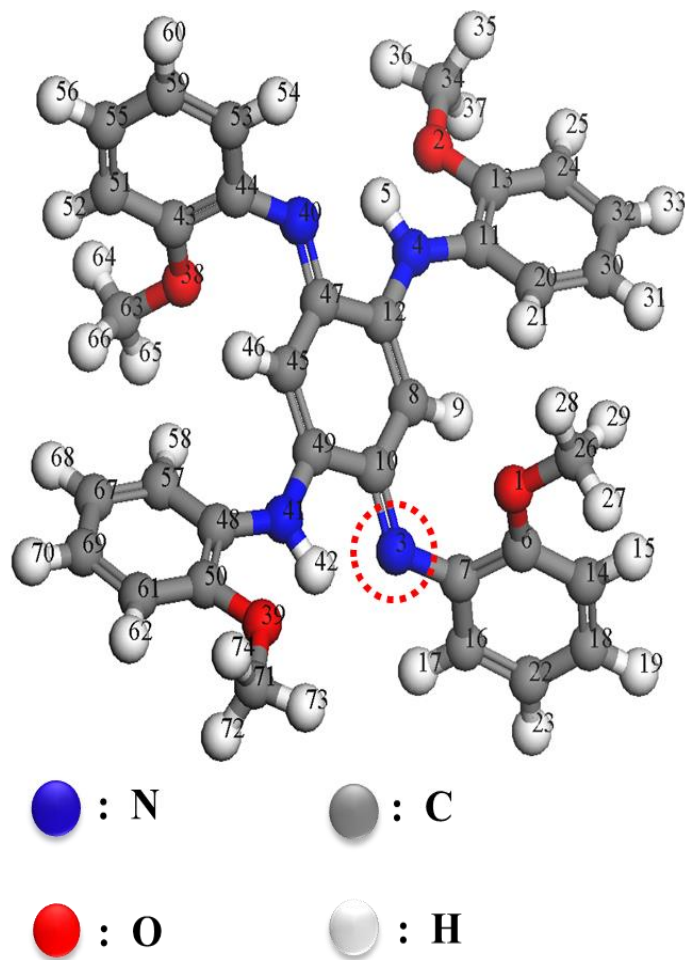

**Fig. S17.** Geometrically optimized structure for CN-1

**Table S1:** Analysis label and concentration average of iron regarding ICP-MS analysis.

| <b>Analysis label</b>     | <b>Concentration per run (57Fe)</b> |            | <b>Concentration average (57Fe)</b> |
|---------------------------|-------------------------------------|------------|-------------------------------------|
| BLANK                     | 1                                   | 0.000 ppm  | 0.000 ppm                           |
| 0.05 ppm<br>ME+Mix+Rb, Cs | 1                                   | 0.042 ppm  | 0.042 ppm                           |
|                           | 2                                   | 0.042 ppm  |                                     |
|                           | 3                                   | 0.041 ppm  |                                     |
| 0.1 ppm ME+Mix+Rb,<br>Cs  | 1                                   | 0.093 ppm  | 0.093 ppm                           |
|                           | 2                                   | 0.095 ppm  |                                     |
|                           | 3                                   | 0.092 ppm  |                                     |
| 0.5 ppm ME+Mix+Rb,<br>Cs  | 1                                   | 0.521 ppm  | 0.522 ppm                           |
|                           | 2                                   | 0.520 ppm  |                                     |
|                           | 3                                   | 0.523 ppm  |                                     |
| 1.0 ppm ME+Mix+Rb,<br>Cs  | 1                                   | 0.986 ppm  | 0.990 ppm                           |
|                           | 2                                   | 0.990 ppm  |                                     |
|                           | 3                                   | 0.995 ppm  |                                     |
| <b>CN 1</b>               | 1                                   | -0.009 ppm | <b>-0.009 ppm</b>                   |
|                           | 2                                   | -0.009 ppm |                                     |
|                           | 3                                   | -0.009 ppm |                                     |

**Table S2:** Performance comparison of CN-1 at different hydrolytic conditions for the HER activity

| <b>Material</b>       | <b>HER (mV)</b> | <b>Tafel slope (mV dec<sup>-1</sup>)</b> | <b>R<sub>ct</sub> (Ω)</b> |
|-----------------------|-----------------|------------------------------------------|---------------------------|
| CN-1                  | 130             | 47                                       | 1.5                       |
| In water 48 h         | 140             | 111                                      | 1.6                       |
| In water 168 h        | 147             | 144                                      | 1.85                      |
| In boiling water 24 h | 152             | 183                                      | 2                         |

**Table S3:** Fukui (-) values for **CN-1**

| Atoms      | Mulliken     | Hirshfeld    |
|------------|--------------|--------------|
| O1         | 0.009        | 0.012        |
| O2         | 0.011        | 0.015        |
| <b>N3</b>  | <b>0.019</b> | <b>0.020</b> |
| N4         | 0.004        | 0.013        |
| C6         | 0.010        | 0.012        |
| C7         | 0.008        | 0.013        |
| C8         | 0.009        | 0.014        |
| C10        | 0.010        | 0.012        |
| C11        | 0.013        | 0.013        |
| C12        | 0.014        | 0.013        |
| C13        | 0.015        | 0.015        |
| C14        | 0.014        | 0.018        |
| <b>C16</b> | <b>0.017</b> | <b>0.020</b> |
| C18        | 0.014        | 0.020        |
| C20        | 0.012        | 0.016        |
| C22        | 0.013        | 0.020        |
| C24        | 0.014        | 0.019        |
| C26        | -0.004       | 0.010        |
| C30        | 0.014        | 0.019        |
| C32        | 0.014        | 0.020        |
| C34        | -0.003       | 0.011        |
| O38        | 0.009        | 0.012        |
| O39        | 0.011        | 0.015        |
| N40        | 0.019        | 0.020        |
| N41        | 0.004        | 0.013        |
| C43        | 0.010        | 0.012        |
| C44        | 0.008        | 0.013        |
| C45        | 0.009        | 0.014        |
| C47        | 0.010        | 0.012        |
| C48        | 0.013        | 0.013        |
| C49        | 0.014        | 0.013        |
| C50        | 0.015        | 0.015        |
| C51        | 0.014        | 0.018        |
| C53        | 0.017        | 0.020        |
| C55        | 0.014        | 0.020        |
| C57        | 0.012        | 0.016        |
| C59        | 0.013        | 0.020        |
| C61        | 0.014        | 0.019        |
| C63        | -0.004       | 0.010        |
| C67        | 0.014        | 0.019        |
| C69        | 0.014        | 0.020        |
| C71        | -0.003       | 0.011        |

**Table S4:** Performance comparison of Metal free electrocatalysts for the HER activity

| Sl No. | Material     | Overpotential (mV at 10 mA cm <sup>-2</sup> ) | Tafel Slope (mV dec <sup>-1</sup> ) | Electrolyte                          | References       |
|--------|--------------|-----------------------------------------------|-------------------------------------|--------------------------------------|------------------|
| 1.     | D-AC         | 334 mV                                        | 66                                  | 0.5 M H <sub>2</sub> SO <sub>4</sub> | 2                |
| 2.     | SHG          | 310 mV                                        | 112                                 | 0.1 M KOH                            | 3                |
| 3.     | NCFs-800     | 114.3 mV                                      | 95.2                                | 0.5 M H <sub>2</sub> SO <sub>4</sub> | 4                |
| 4.     | NCFs-800     | 198.6 mV                                      | 131.3                               | 1 M KOH                              |                  |
| 5.     | N-VG         | 290 mV                                        | 121                                 | 0.5 M H <sub>2</sub> SO <sub>4</sub> | 5                |
| 6.     | TPPAM        | 250 mV                                        | 106                                 | 1 M KOH                              | 6                |
| 7.     | SHG          | 230 mV                                        | 112                                 | 1 M KOH                              | 3                |
| 8.     | Nr-HGM-1000  | 337 mV                                        | 99                                  | 0.5 M H <sub>2</sub> SO <sub>4</sub> | 7                |
| 9.     | Nr-HGM-1000  | 510 mV                                        | 157                                 | 0.1M KOH                             |                  |
| 10.    | GNP-900      | 179 mV                                        | 93                                  | 0.1 M KOH                            | 8                |
| 11.    | N,P-HCNF-8   | 550 mV                                        | 161                                 | 0.1 M KOH                            | 9                |
| 12.    | Ind-CPP      | 359 mV                                        | 64                                  | 0.5 M H <sub>2</sub> SO <sub>4</sub> | 10               |
| 13.    | Ind-CPP      | 364 mV                                        | 73                                  | 1 M KOH                              |                  |
| 14.    | GO-PANi31-FP | 0.52 V                                        |                                     | 1 M KOH                              | 11               |
| 15.    | HT-AFNG      | 350 mV                                        | 113                                 | 0.5 M H <sub>2</sub> SO <sub>4</sub> | 12               |
| 16.    | AFNG         | 372 mV                                        | 120                                 | 0.5 M H <sub>2</sub> SO <sub>4</sub> |                  |
| 17.    | NG           | 564 mV                                        | 138                                 | 0.5 M H <sub>2</sub> SO <sub>4</sub> |                  |
| 18.    | CN-1         | 130 mV                                        | 47                                  | 1 M KOH                              | <b>This Work</b> |

## References

- 1 Y. Zheng, Y. Jiao, M. Jaroniec and S. Z. Qiao, *Angew. Chemie Int. Ed.*, 2015, **54**, 52–65.
- 2 X. Yan, Y. Jia, T. Odedairo, X. Zhao, Z. Jin, Z. Zhu and X. Yao, *Chem. Commun.*, 2016, **52**, 8156–8159.
- 3 C. Hu and L. Dai, *Adv. Mater.*, DOI:10.1002/adma.201604942.
- 4 J. Sun, Q. Ge, L. Guo and Z. Yang, *Int. J. Hydrogen Energy*, 2020, **45**, 4035–4042.
- 5 Y. Li, C. Ai, S. Deng, Y. Wang, X. Tong, X. Wang, X. Xia and J. Tu, *Mater. Res. Bull.*, 2021, **134**, 111094.
- 6 B. C. Patra, S. Khilari, R. N. Manna, S. Mondal, D. Pradhan, A. Pradhan and A. Bhaumik, *ACS Catal.*, 2017, **7**, 6120–6127.
- 7 J.-M. Ge, B. Zhang, L.-B. Lv, H.-H. Wang, T.-N. Ye, X. Wei, J. Su, K.-X. Wang, X.-H. Li and J.-S. Chen, *Nano Energy*, 2015, **15**, 567–575.
- 8 Z. Liu, M. Wang, X. Luo, S. Li, S. Li, Q. Zhou, W. Xu and R. Wu, *Appl. Surf. Sci.*, 2021, **544**, 148912.
- 9 Y. Gao, Z. Xiao, D. Kong, R. Iqbal, Q.-H. Yang and L. Zhi, *Nano Energy*, 2019, **64**, 103879.
- 10 I. Nath, J. Chakraborty, R. Lips, S. Dekyvere, J. Min, R. S. Varma and F. Verpoort, *J. Mater. Chem. A*, 2023, **11**, 10699–10709.
- 11 J. Zhang and L. Dai, *Angew. Chemie*, 2016, **128**, 13490–13494.
- 12 B. Deng, D. Wang, Z. Jiang, J. Zhang, S. Shi, Z.-J. Jiang and M. Liu, *Carbon N. Y.*, 2018, **138**, 169–178.
